# Supplementary material for: MARCH8 Suppresses Tumor Metastasis and Mediates Degradation of STAT3 and CD44 in Breast Cancer Cells
Source: MDPI journal article supplement (doi:10.3390/cancers13112550), 2021-05-22

|        |          |          |          |      |
|--------|----------|----------|----------|------|
| Fig 3A | M8       | actin    | ratio    |      |
| 1      | 3270.983 | 4874.062 | 0.6711   | 1.00 |
| 2      | 805.406  | 7441.912 | 0.108226 | 0.16 |
| 3      | 442.042  | 7151.912 | 0.061808 | 0.09 |
| 4      | 719.991  | 6025.418 | 0.119492 | 0.18 |
| 5      | 611.184  | 4747.305 | 0.128743 | 0.19 |
| 6      | 276.506  | 4674.669 | 0.05915  | 0.09 |

|        |          |          |          |
|--------|----------|----------|----------|
| Fig 3B | M8GFP    | actin    | r        |
| 1      | 89.364   | 3767.456 | 0.02372  |
| 2      | 5794.418 | 3257.92  | 1.778564 |

|        |          |          |          |           |          |
|--------|----------|----------|----------|-----------|----------|
| Fig 4B | caspase  | M8       | actin    | r caspase | r M8     |
| 1      | 0        | 0        | 5822.648 | 0         | 0        |
| 2      | 3079.619 | 0        | 6593.255 | 0.467086  | 0        |
| 3      | 3417.698 | 0        | 5545.234 | 0.616331  | 0        |
| 4      | 0        | 14501.95 | 5833.184 | 0         | 2.486111 |
| 5      | 5576.598 | 14800.14 | 6098.012 | 0.914494  | 2.427043 |
| 6      | 8839.548 | 15081.87 | 7625.255 | 1.159246  | 1.977885 |

|        |          |          |          |          |          |          |          |          |          |
|--------|----------|----------|----------|----------|----------|----------|----------|----------|----------|
| Fig 5A | CD44     | BAX      | BID      | M8 GFP   | actin    | rCD44    | rBAX     | rBID     | rM8      |
| 1      | 6914.477 | 705.456  | 2114.406 | 0        | 6618.962 | 1.044647 | 0.106581 | 0.319447 | 0        |
| 2      | 740.092  | 3315.698 | 7144.548 | 11391.36 | 6821.305 | 0.108497 | 0.48608  | 1.047387 | 1.669968 |
|        |          | ?        |          |          |          |          |          |          |          |

|        |          |          |          |          |          |
|--------|----------|----------|----------|----------|----------|
| Fig 5D | CD44     | M8 GFP   | actin    | rCD44    | rM8      |
| 1      | 13473.95 | 0        | 11803.23 | 1.141548 | 0        |
| 2      | 2422.619 | 13435.97 | 11520.23 | 0.210293 | 1.166294 |
| 3      | 757.698  | 16158.85 | 9951.033 | 0.076143 | 1.623837 |
| 4      | 11117.49 | 15158.15 | 9927.397 | 1.11988  | 1.5269   |

|        |          |          |          |          |          |          |          |          |          |
|--------|----------|----------|----------|----------|----------|----------|----------|----------|----------|
| Fig 5F | BAX      | BID      | CD44     | M8 GFP   | actin    | rBAX     | rBID     | rCD44    | rM8      |
| 1      | 0        | 0        | 14085.59 | 0        | 11198.98 | 0        | 0        | 1.257756 | 0        |
| 2      | 4456.184 | 5317.426 | 7682.569 | 15020.71 | 11757.4  | 0.379011 | 0.452262 | 0.653424 | 1.277554 |
| 3      | 3115.355 | 3088.184 | 11488.71 | 13698.39 | 12167.05 | 0.256048 | 0.253815 | 0.944248 | 1.125859 |

|        |          |          |          |          |          |          |          |          |          |
|--------|----------|----------|----------|----------|----------|----------|----------|----------|----------|
| Fig 6A | AKT      | pAKT     | ERK      | pERK     | actin    | rAKT     | rpAKT    | rERK     | rpERK    |
| 1      | 3435.983 | 7772.447 | 5498.782 | 7988.69  | 7385.962 | 0.465205 | 1.052327 | 0.744491 | 1.081605 |
| 2      | 3351.912 | 6541.497 | 5655.368 | 9790.518 | 7433.962 | 0.450892 | 0.879948 | 0.760747 | 1.316999 |
| 3      | 2867.548 | 8129.347 | 5978.371 | 7238.569 | 6819.426 | 0.420497 | 1.192087 | 0.876668 | 1.061463 |
| 4      | 7254.033 | 6757.912 | 5421.974 | 7994.933 | 6345.962 | 1.143094 | 1.064915 | 0.854397 | 1.259846 |

|        |          |          |          |          |          |          |          |          |          |          |
|--------|----------|----------|----------|----------|----------|----------|----------|----------|----------|----------|
| Fig 6D | CD44 A   | CD44 S   | STAT A   | STAT S   | BID A    | BID S    | BAX A    | BAX S    | actin A  | actin S  |
| 1      | 9219.397 | 7136.79  | 5697.184 | 5730.305 | 0        | 0        | 0        | 0        | 7641.598 | 7323.891 |
| 2      | 4995.669 | 3162.891 | 6904.962 | 7615.225 | 4418.113 | 3794.719 | 2805.77  | 4855.941 | 8360.548 | 7517.255 |
| 3      | 11841.84 | 12129.98 | 7000.548 | 6121.083 | 2891.527 | 1990.355 | 1403.82  | 2702.77  | 8500.497 | 7562.134 |
| 4      | 2634.134 | 3884.083 | 6625.255 | 6131.79  | 2489.698 | 1797.527 | 1747.698 | 1882.355 | 8622.912 | 7972.305 |
| 5      | 3564.548 | 2458.012 | 10346.18 | 10092.49 | 1250.406 | 847.82   | 1201.82  | 816.163  | 8732.326 | 6897.305 |
| 6      | 3820.669 | 1124.234 | 7323.447 | 5435.255 | 4386.648 | 3945.698 | 5184.527 | 2633.941 | 8523.497 | 7035.719 |
|        | rCD44 A  | rCD44 S  | rSTAT A  | rSTAT S  | rBID A   | rBID S   | rBAX A   | rBAX S   |          |          |
| 1      | 1.206475 | 0.974453 | 0.745549 | 0.782413 | 0        | 0        | 0        | 0        |          |          |
| 2      | 0.597529 | 0.420751 | 0.825898 | 1.013033 | 0.528448 | 0.504801 | 0.335596 | 0.645973 |          |          |
| 3      | 1.393077 | 1.604042 | 0.823546 | 0.809439 | 0.34016  | 0.2632   | 0.165146 | 0.357408 |          |          |
| 4      | 0.305481 | 0.487197 | 0.768332 | 0.769136 | 0.288731 | 0.225471 | 0.202681 | 0.236112 |          |          |
| 5      | 0.408201 | 0.356373 | 1.184813 | 1.463251 | 0.143193 | 0.12292  | 0.137629 | 0.118331 |          |          |
| 6      | 0.448251 | 0.159789 | 0.859207 | 0.772523 | 0.514654 | 0.560809 | 0.608263 | 0.374367 |          |          |

**Fig 3. MARCH8 induces apoptosis in TNBC cells**

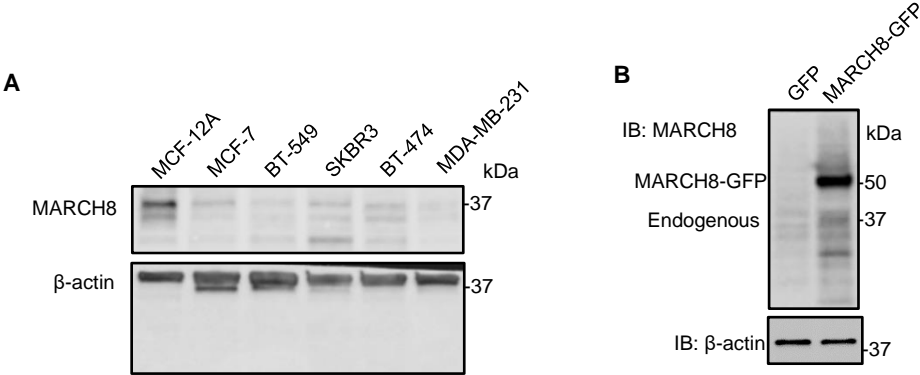

**Fig 4. MARCH8 inhibits colony formation *in vitro* and lung colonization *in vivo***

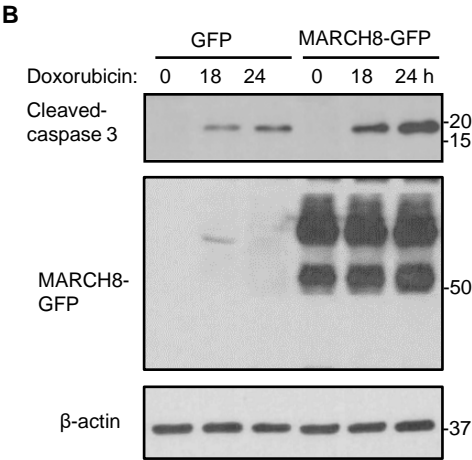

**Fig 5. MARCH8 interacts with and degrades CD44 through the lysosome pathway.**

**A**

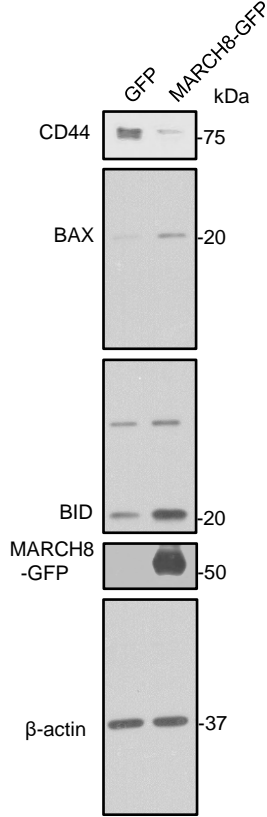

**E** HEK-293 (CLQ)

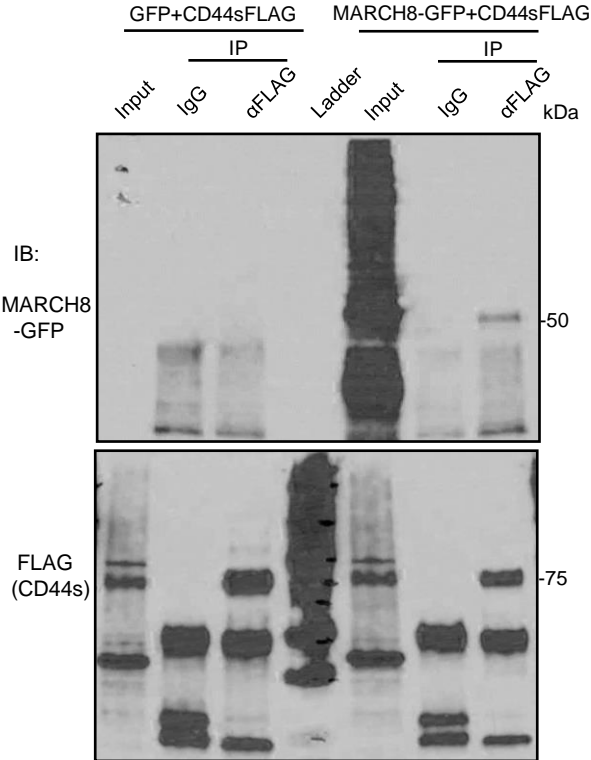

**F**

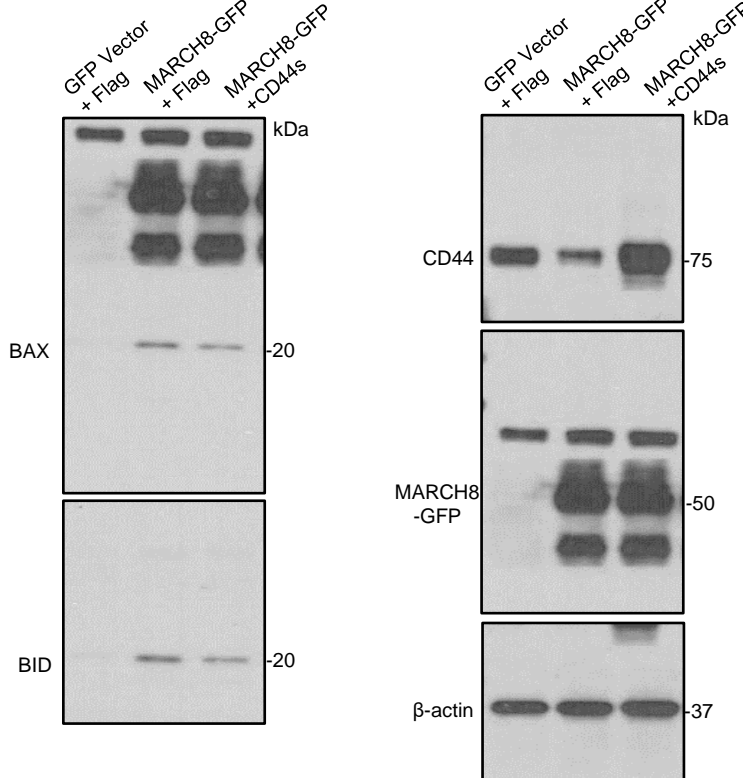

Full blot for Figure 6

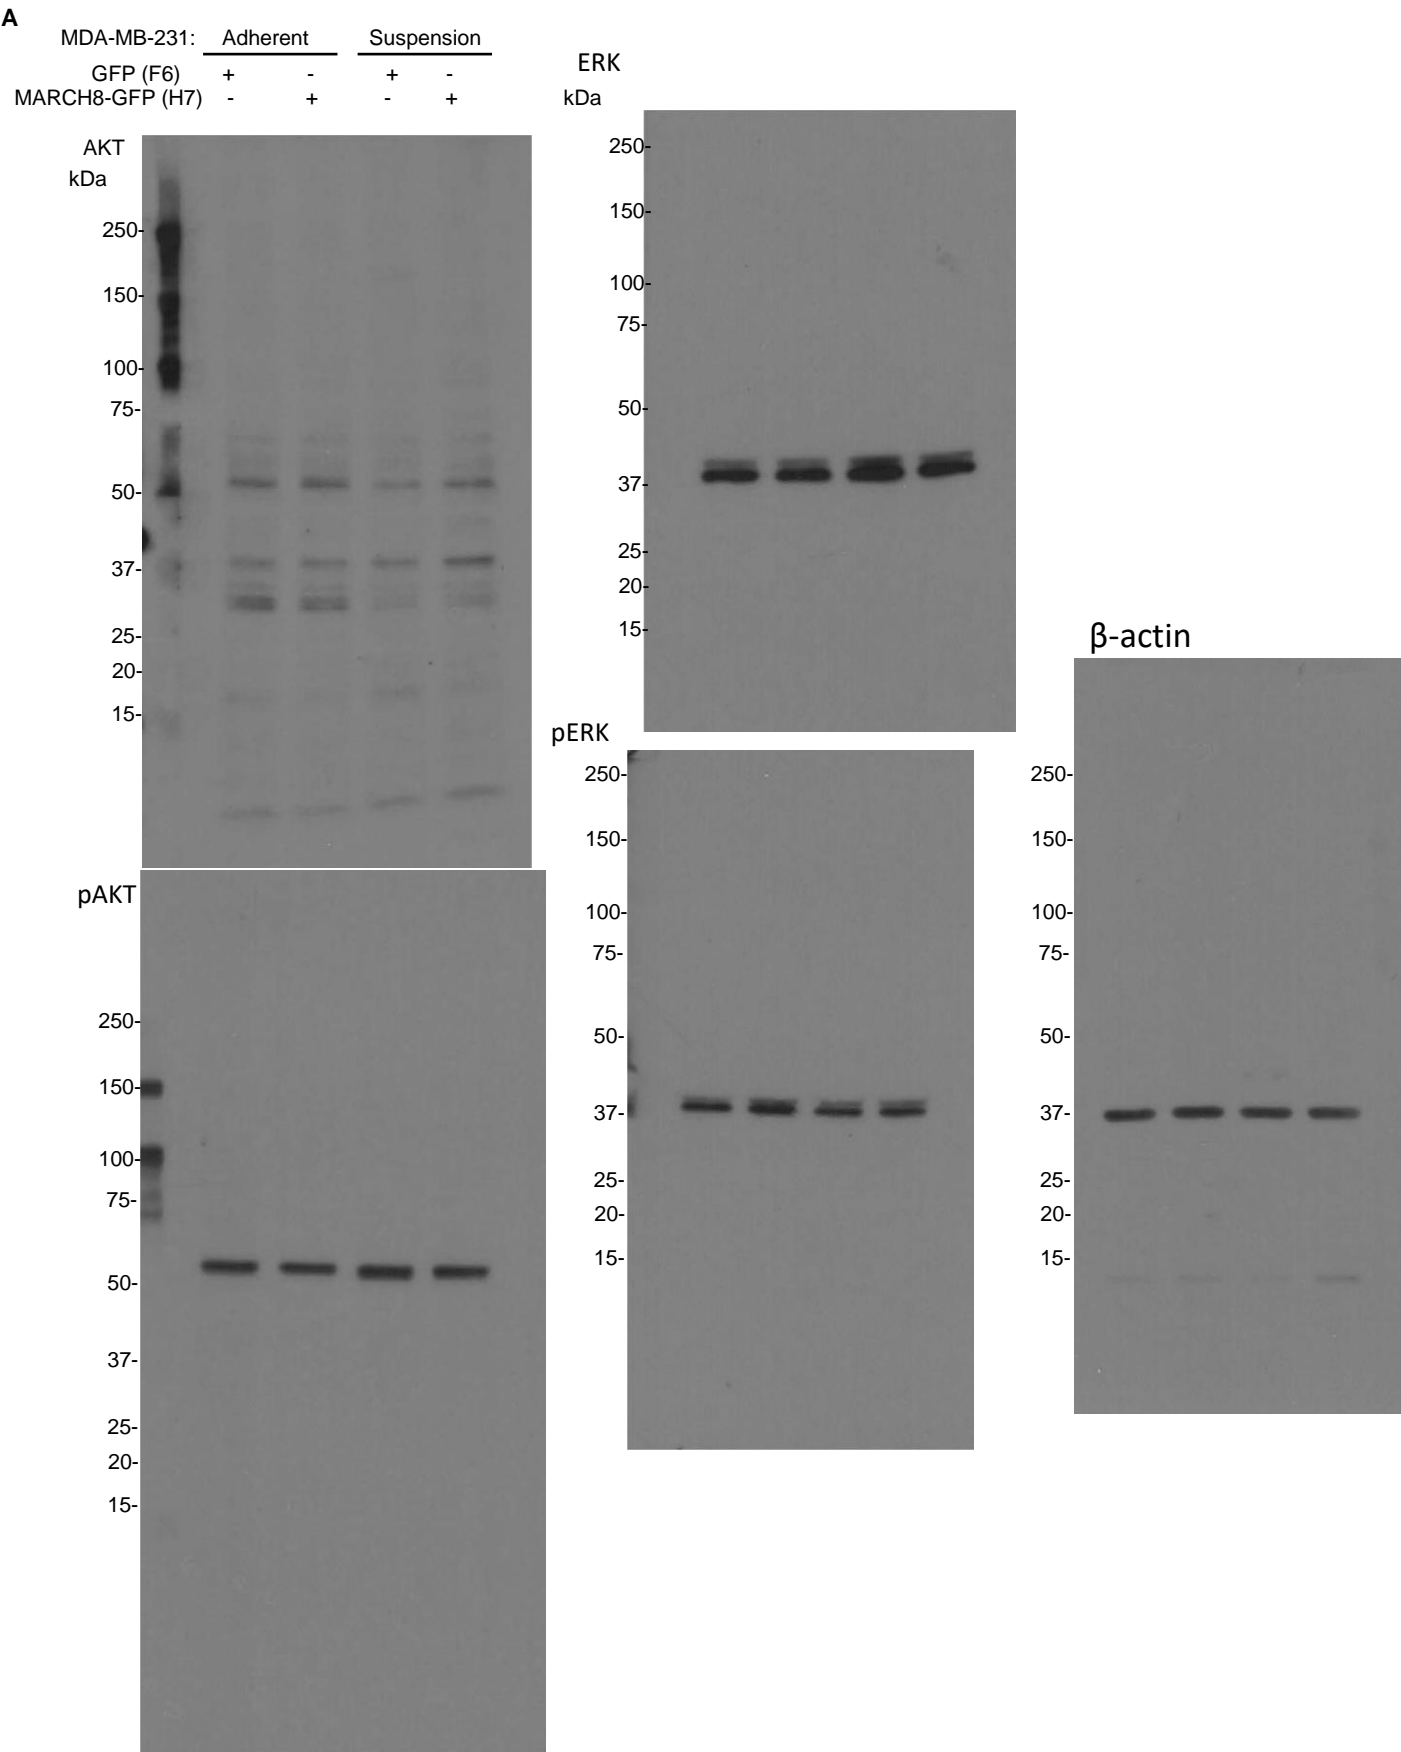

**B**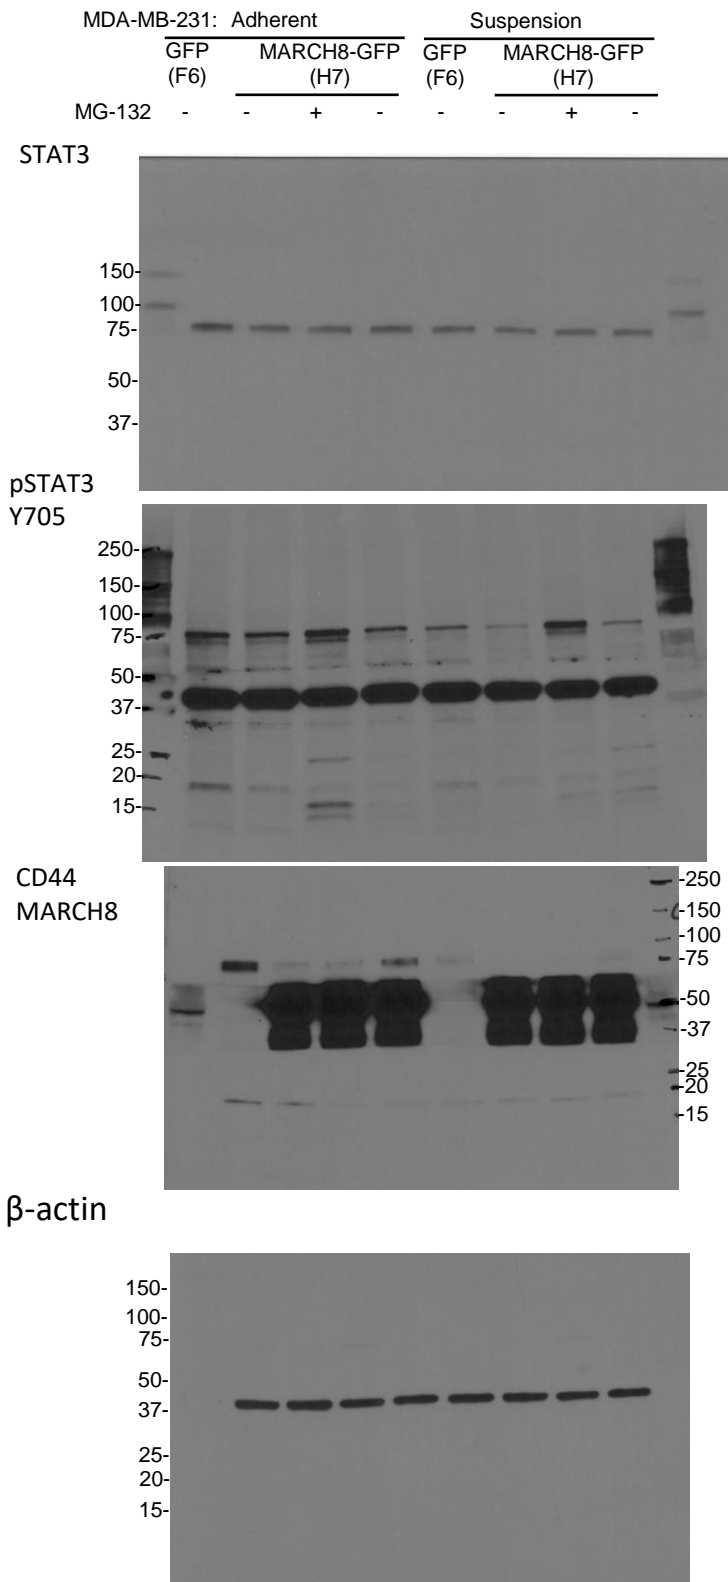

**C**

HEK293 cells + MG-132:

|             | Input |   |   |   | STAT3 IP |   |   |   | p-STAT3 (Y705) IP |   |   |   |
|-------------|-------|---|---|---|----------|---|---|---|-------------------|---|---|---|
| STAT3 Y705F | -     | - | + | + | -        | - | + | + | -                 | - | + | + |
| GFP         | +     | - | + | - | +        | - | + | - | +                 | - | + | - |
| MARCH8-GFP  | -     | + | - | + | -        | + | - | + | -                 | + | - | + |

IB: MARCH8

250-  
150-  
100-  
75-  
50-  
37-  
25-  
20-  
15-

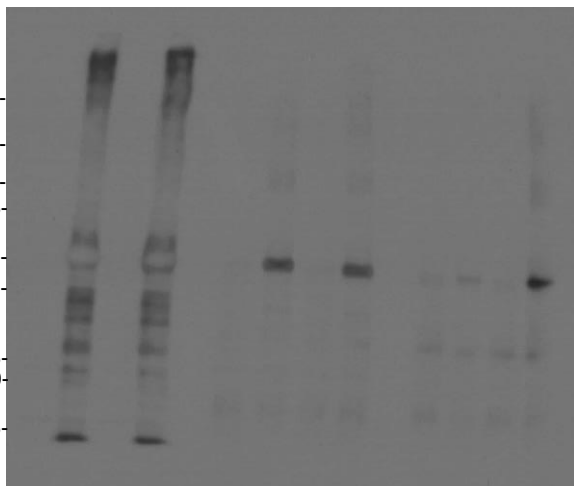

STAT3

250-  
150-  
100-  
75-  
50-  
37-  
25-  
20-  
15-

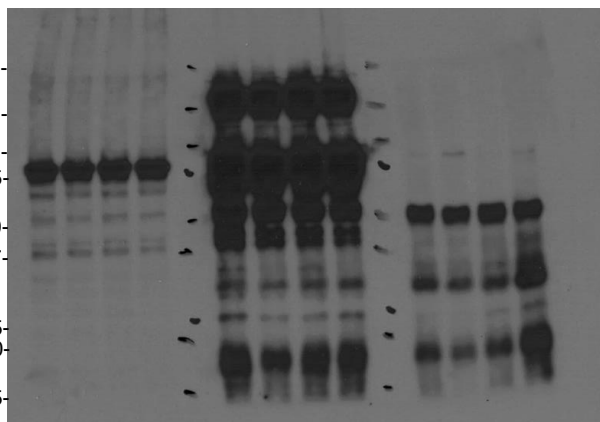

p-STAT3  
Y705

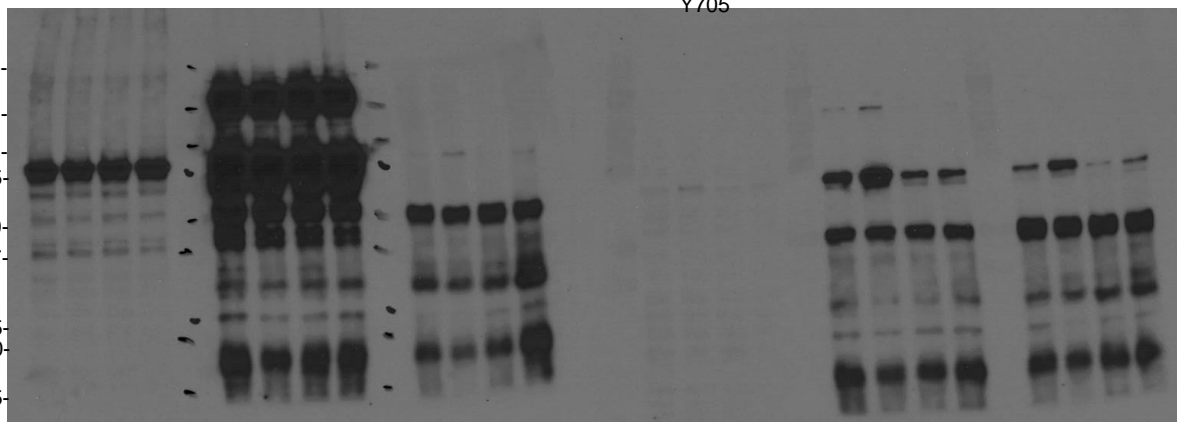

IB: ubiquitin

250-  
150-  
100-  
75-  
50-  
37-  
25-  
20-  
15-

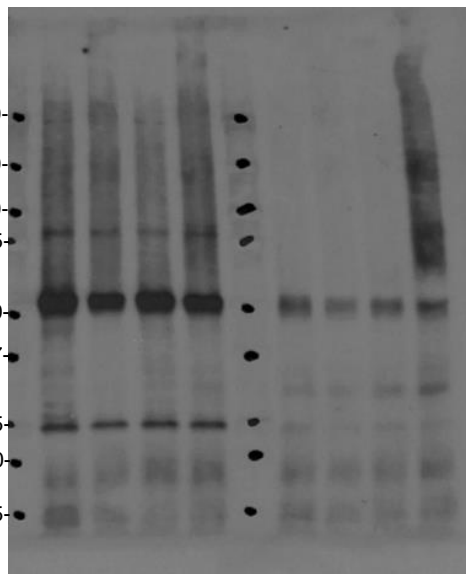

D

|             |          |   |   |   |   |   |            |   |   |   |   |   |
|-------------|----------|---|---|---|---|---|------------|---|---|---|---|---|
| MDA-MB-231: | Adherent |   |   |   |   |   | Suspension |   |   |   |   |   |
| GFP         | +        | + | - | - | - | - | +          | + | - | - | - | - |
| MARCH8-GFP  | -        | + | + | + | + | + | -          | + | + | + | + | + |
| CD44        | -        | - | + | - | - | - | -          | - | + | - | - | - |
| STAT3       | -        | - | - | + | - | - | -          | - | - | + | - | - |
| STAT3 Y705F | -        | - | - | - | + | - | -          | - | - | - | + | - |

kDa

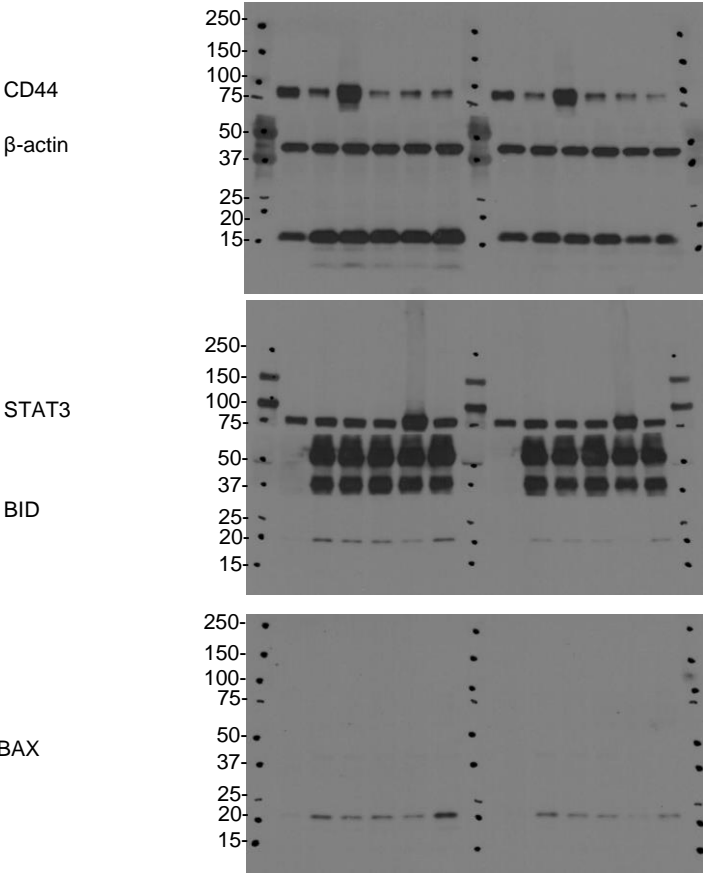

Supplement: s1 [file s1]
